# Supplementary material for: High-performance n-type polymer field-effect transistors with exceptional stability
Source: Royal Society of Chemistry journal article supplement (doi:10.1039/d4tc03294b), 2024-01-01
Supplement: d4tc03294b1.pdf [file d4tc03294b1.pdf]

## Supplementary Information

### **High-Performance n-type Polymer Field-effect Transistors with Exceptional Stability**

Manikanta Makala<sup>1</sup>, Maciej Barłóg<sup>2</sup>, Derek Dremann<sup>1</sup>, Salahuddin Attar<sup>2</sup>, Edgar Gutiérrez Fernández<sup>3,4</sup>, Mohammed Al-Hashimi<sup>2\*</sup>, Oana D. Jurchescu<sup>1\*</sup>

<sup>1</sup>Department of Physics and Center for Functional Materials (CFM), Wake Forest University, Winston Salem, NC 27019, USA.

<sup>2</sup>Department of Chemical Engineering, Texas A&M University at Qatar, P.O. Box 23874, Doha, Qatar.

<sup>3</sup>Department of Physics, University of Warwick, Gibbet Hill Road, Coventry, CV4 7AL, UK.

<sup>4</sup>XMas/BM28-ESRF, 71 Avenue Des Martyrs, F-38043 Grenoble Cedex, France.

\*Corresponding authors: [jurchescu@wfu.edu](mailto:jurchescu@wfu.edu), [mohammed.al-hashimi@tamu.edu](mailto:mohammed.al-hashimi@tamu.edu).

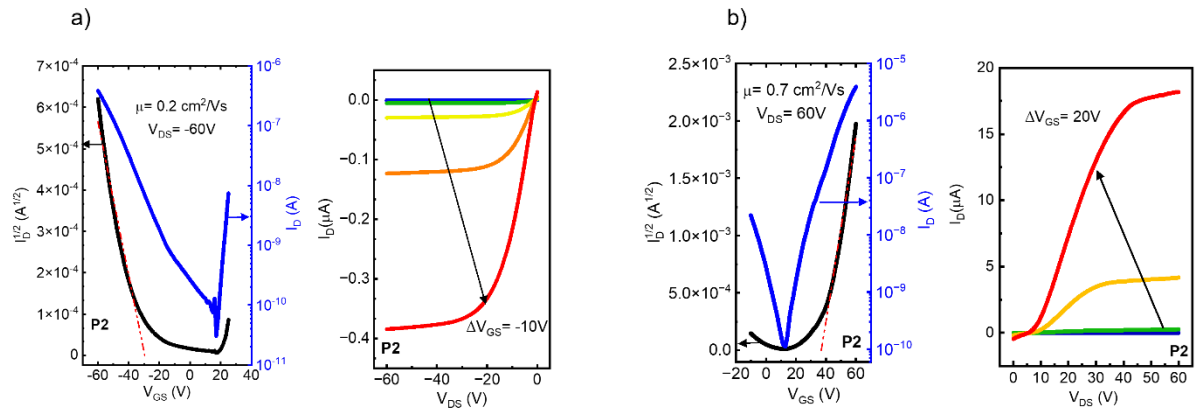

**Figure S1.** Transfer and output characteristics of a p-type OFETs based on P2. Here  $L/W=50/400$  (a), transfer and output characteristics of n-type OFETs based on P2. Here  $L/W=40/800$  (b).

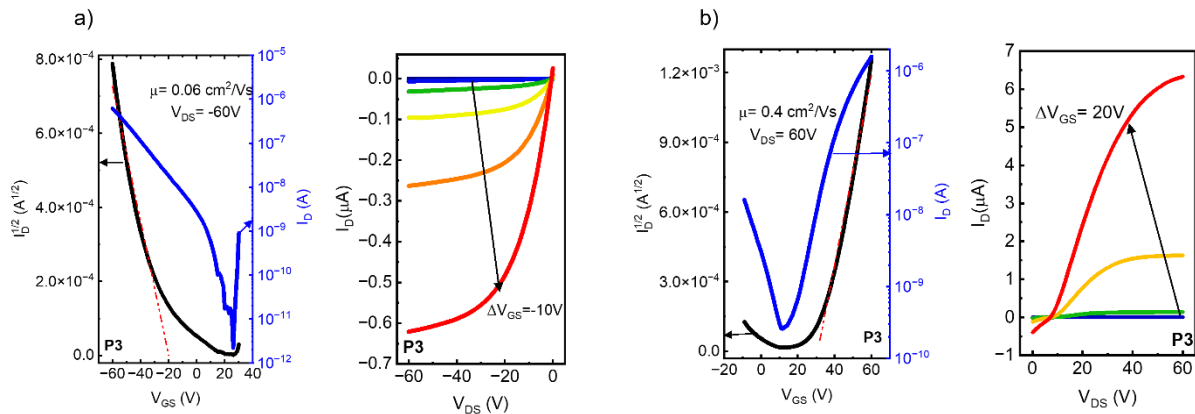

**Figure S2.** Transfer and output characteristics of a p-type OFETs based on P3. Here  $L/W=30/400$  (a), transfer and output characteristics of n-type OFETs based on P3. Here  $L/W=40/400$  (b).

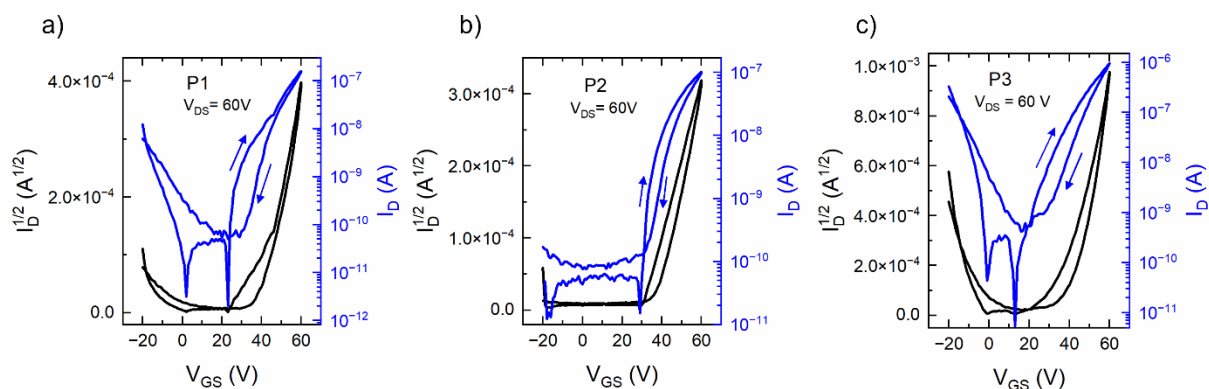

**Figure S3.** Hysteresis in transfer characteristics of a n-type OFETs based on polymers P1 (a), P2 (b), P3 (c).

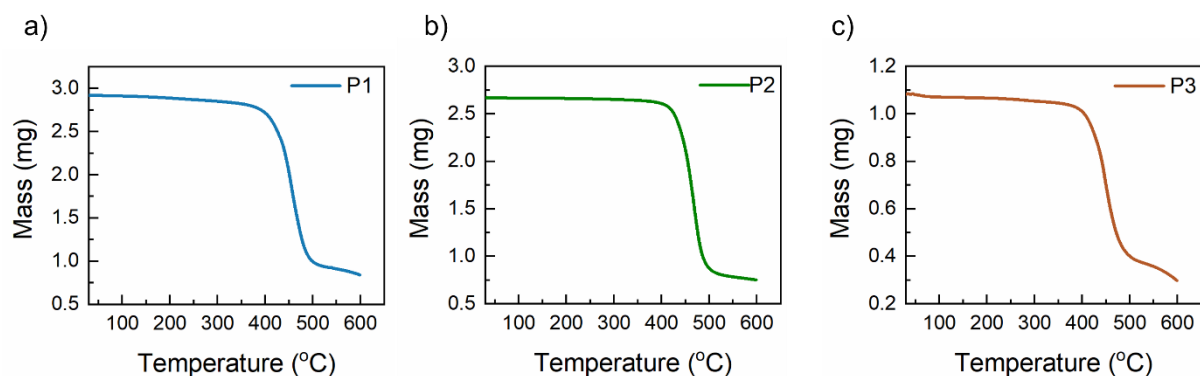

**Figure S4.** Thermogravimetric analysis (TGA) curves of polymers P1 (a), P2 (b), P3 (c). The decomposition temperatures ( $T_d$ ) corresponding to 5% mass for polymers P1, P2 and P3 are 384 °C, 421 °C, and 386 °C, respectively.

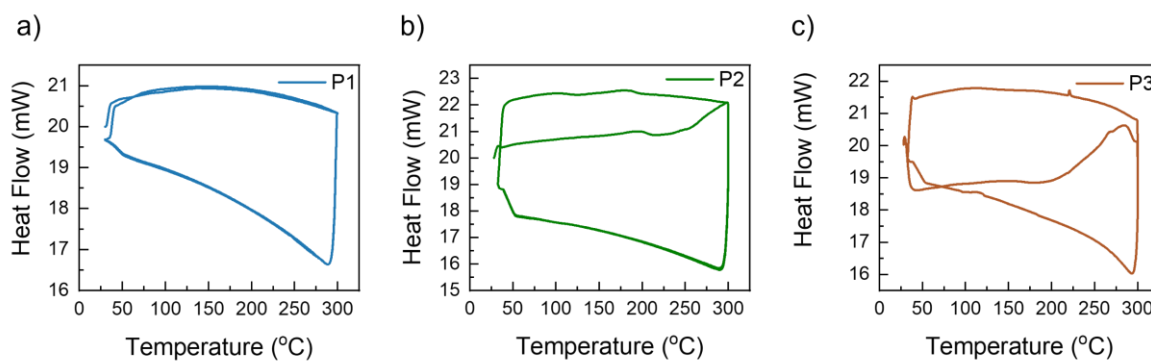

**Figure S5.** Differential scanning calorimetry (DSC) thermograms of Polymers P1 (a), P2 (b), P3 (c).

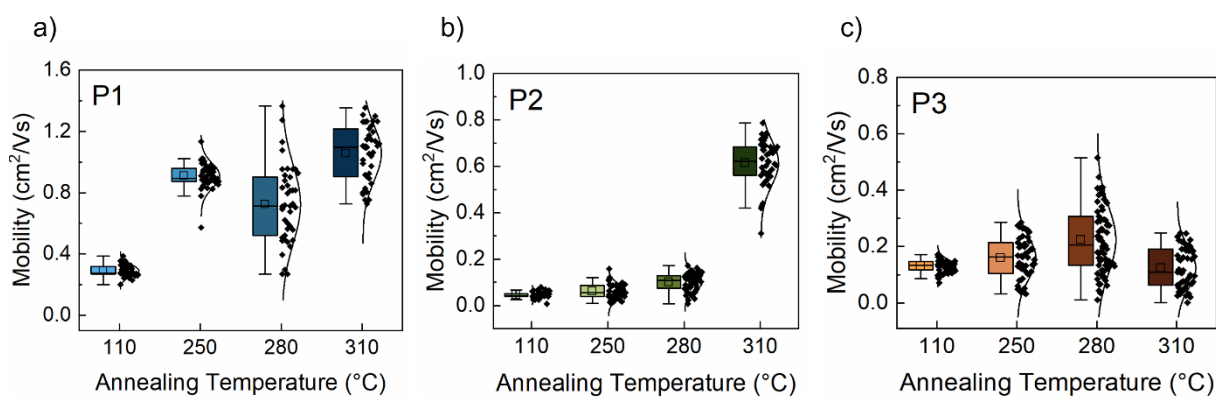

**Figure S6.** Mobility values for the n-type OFETs fabricated on polymer films that were annealed at temperatures ranging from 110 °C to 310 °C for P1 (a), P2 (b), and P3 (c).

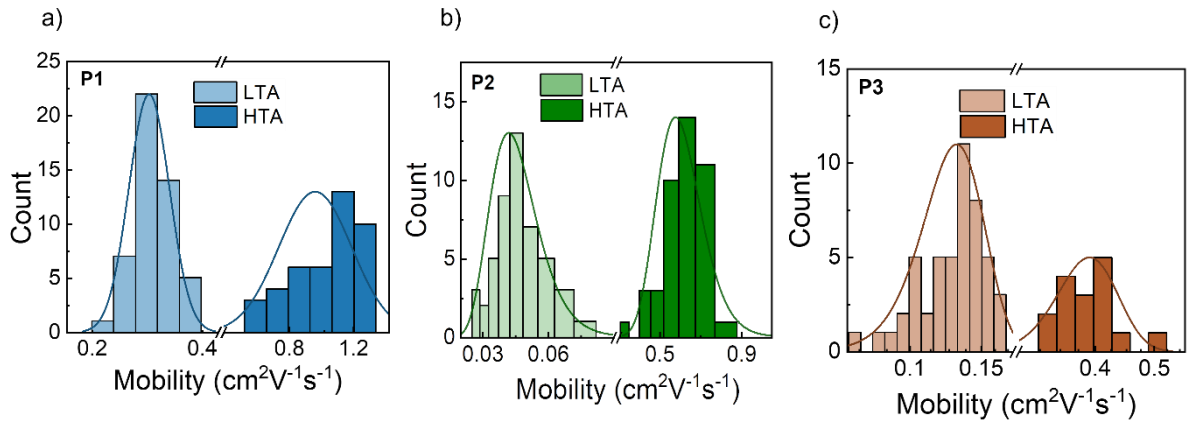

**Figure S7.** Mobility histograms of n-type OFETs based on polymer films annealed at low temperature (LTA) and high temperatures (HTA) for P1 (a), P2 (b), and P3 (c).

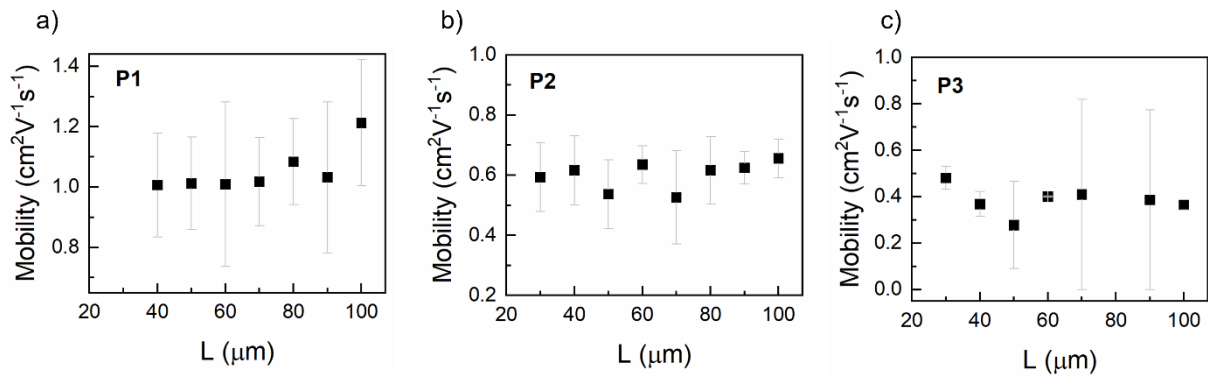

**Figure S8.** Channel length dependence of electron mobility for P1 (a), P2 (b), and P3 (c).

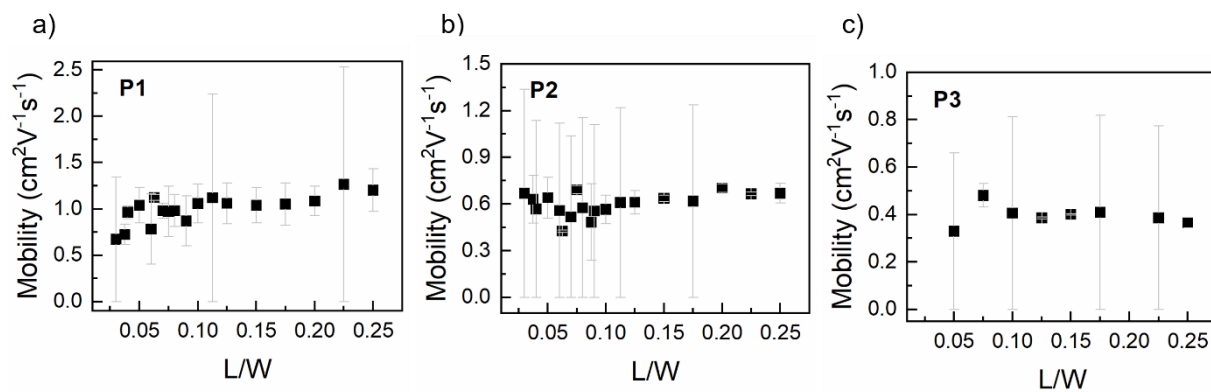

**Figure S9.** Dependence of electron mobility on width normalized channel length for P1 (a), P2 (b), and P3 (c).

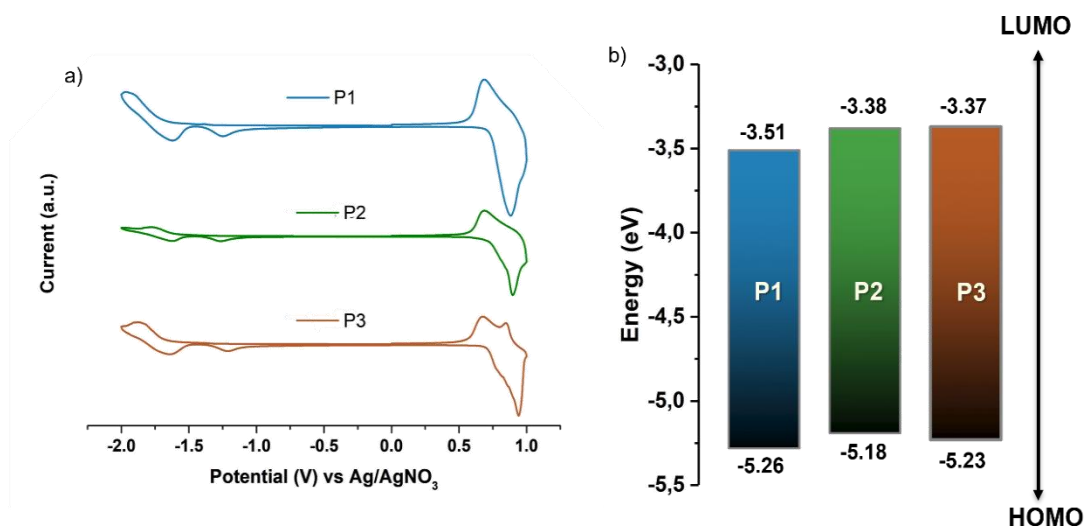

**Figure S10.** Cyclic voltammograms of P1–P3 films on a glassy carbon electrode measured in a  $0.1 \text{ mol L}^{-1} \text{ Bu}_4 \text{ N}^+ \text{ PF}_6^-$  acetonitrile solution at a scan rate of  $0.1 \text{ V s}^{-1}$ ; (b) energy-level diagram for P1–P3 according to CV measurements.

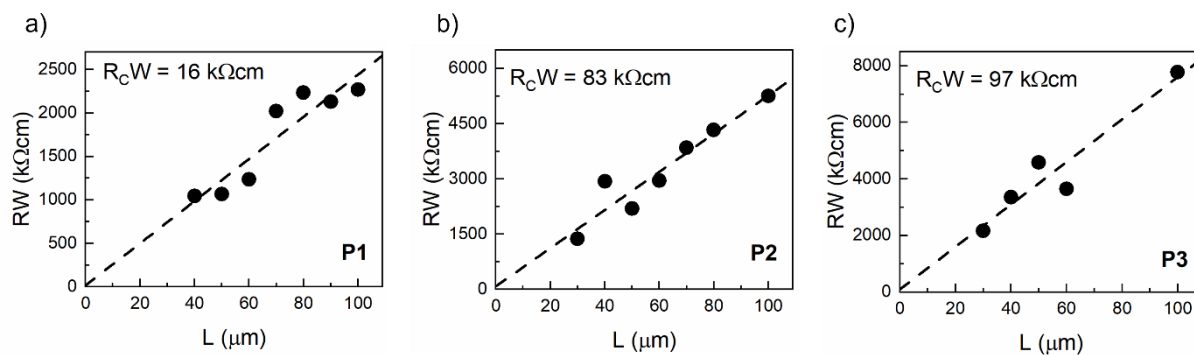

**Figure S11.** Width-normalized total OFET resistance plotted as a function of channel length L in n-channel OFETs based on P1 (a), P2 (b), and P3 (c).

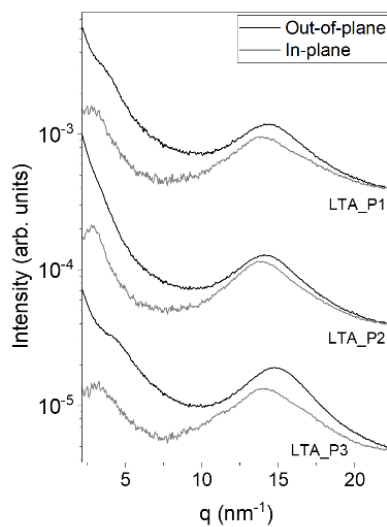

**Figure S12.** Azimuthal integrations of the GIWAXS patterns along the  $q_z$  axis (out-of-plane) and along the  $q_r$  axis (in-plane).

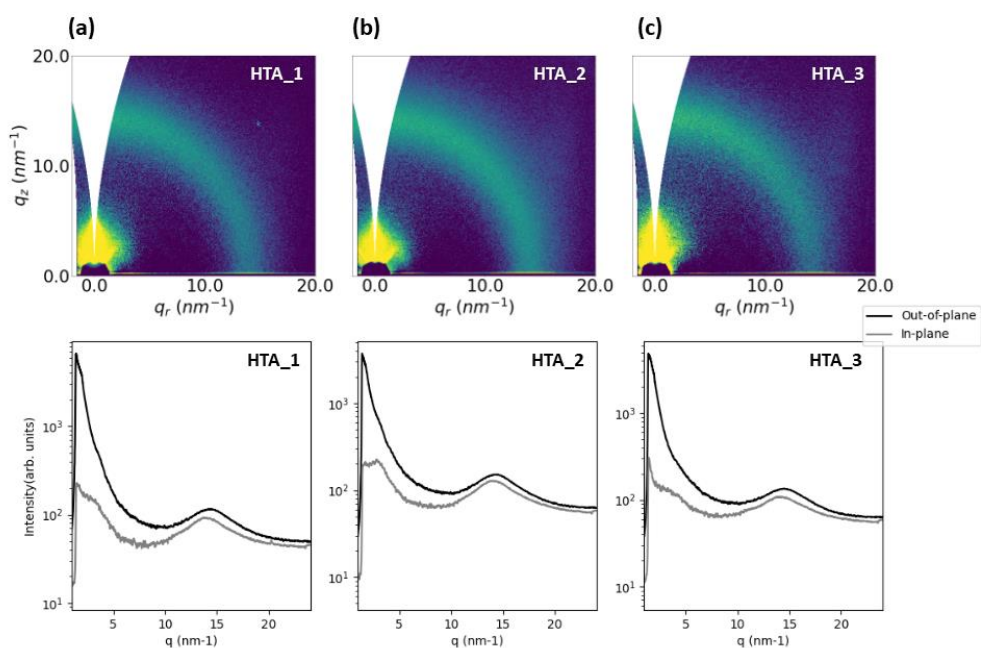

**Figure S13.** Upper row: 2D scattering GIWAXS patterns acquired on films of polymers P1 (a), P2 (b), P3 (c) annealed at high temperatures. Bottom row: corresponding azimuthal integrations of the GIWAXS patterns along the vertical (out-of-plane) and horizontal (in-plane) axis.

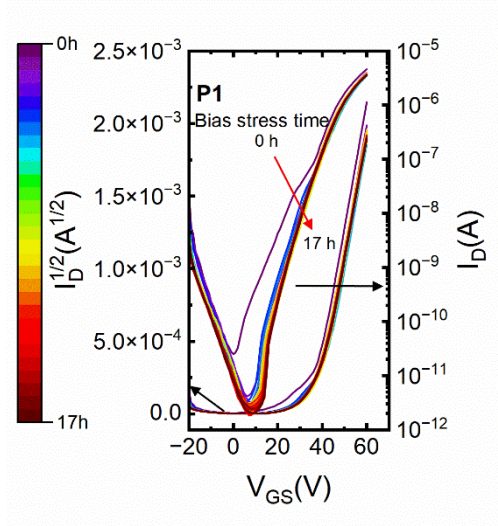

**Figure S14.** Transfer curves measured on OFETs of P1 films annealed at high temperatures (HTA) during 17h of continuous bias stress at  $V_{GS} = V_{DS} = 60\text{V}$ .



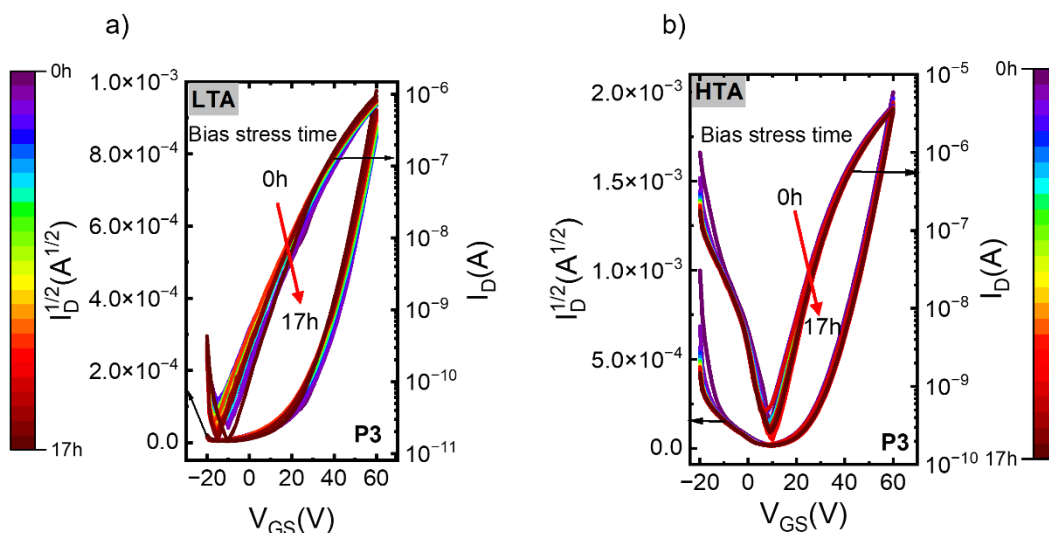

**Figure S15.** a) Transfer curves measured on OFETs of P2 films annealed at low temperatures (LTA) during 17h of continuous bias stress at  $V_{GS}=V_{DS}=60V$ . b) Transfer curves measured on OFETs of P2 films annealed at high temperatures (HTA) during 17h of continuous bias stress at  $V_{GS}=V_{DS}=60V$ .

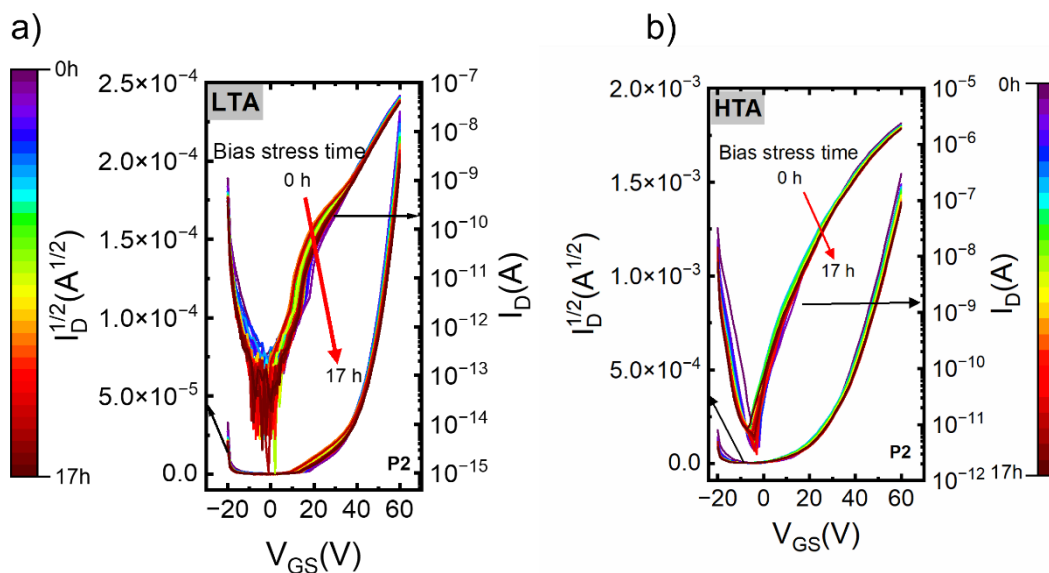

**Figure S16.** a) Transfer curves measured on OFETs of P3 films annealed at low temperatures (LTA) during 17h of continuous bias stress at  $V_{GS}=V_{DS}=60V$ . b) Transfer curves measured on OFETs of P3 films annealed at high temperatures (HTA) during 17h of continuous bias stress at  $V_{GS}=V_{DS}=60V$ .

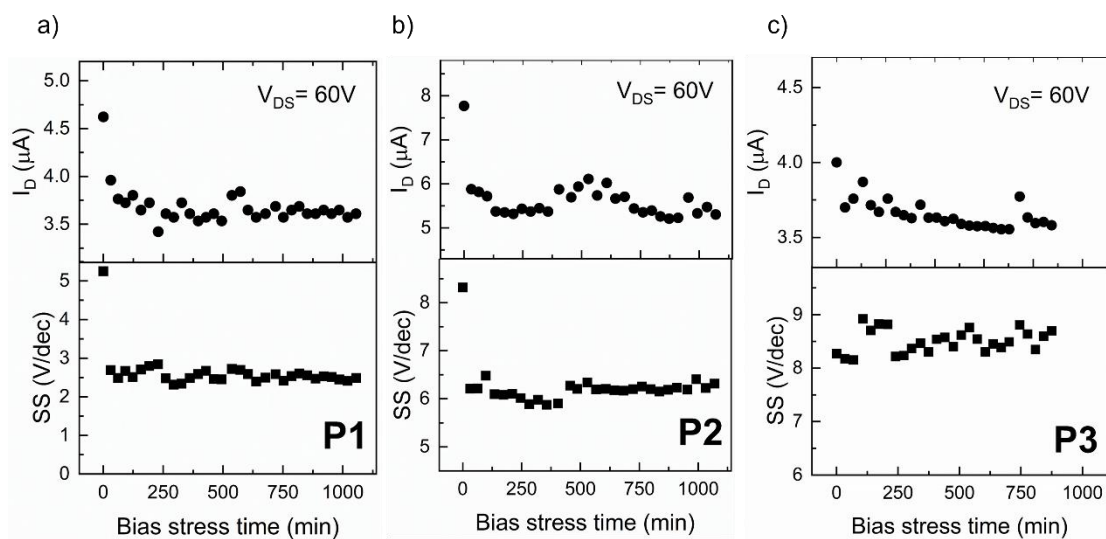

**Figure S17.** Evolution of drain current and subthreshold slope with time for n-type OFETs upon continuous bias stress at  $V_{GS} = V_{DS} = 60V$  based on P1 (a), P2 (b), and P3 (c).

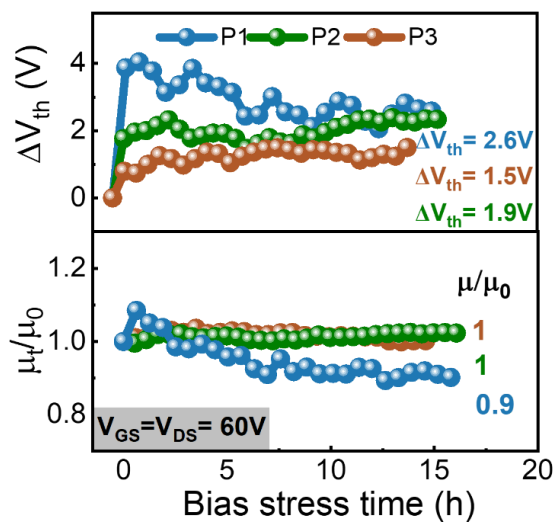

**Figure S18.** a) Evolution of  $\Delta V_{th}$  and mobility with stress time for n-type OFETs upon continuous bias stress at  $V_{GS} = V_{DS} = 60V$  based on polymer annealed at high temperatures.

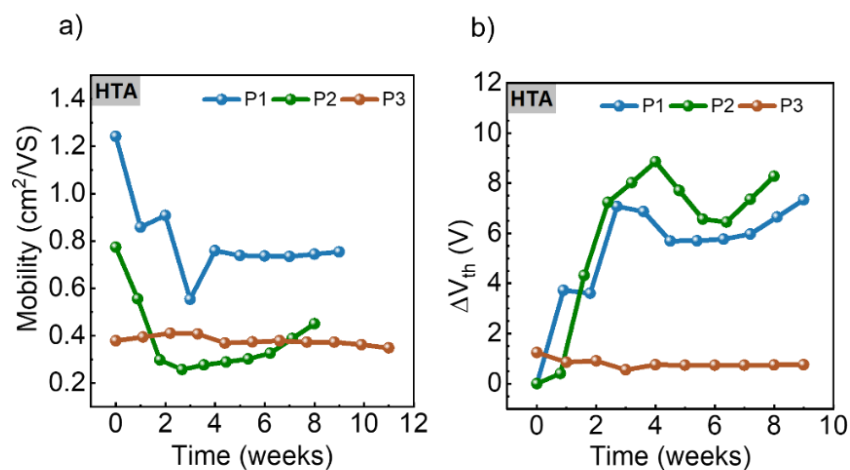

**Figure S19.** Shelf-life study on three polymers with minimum exposure to humidity: evolution of  $\mu$  (a), and  $\Delta V_{th}$  (b). The samples were stored in an amber-colored desiccator at room temperature under 750 torr between measurements and briefly exposed to the ambient atmosphere during transfer to the probe station.

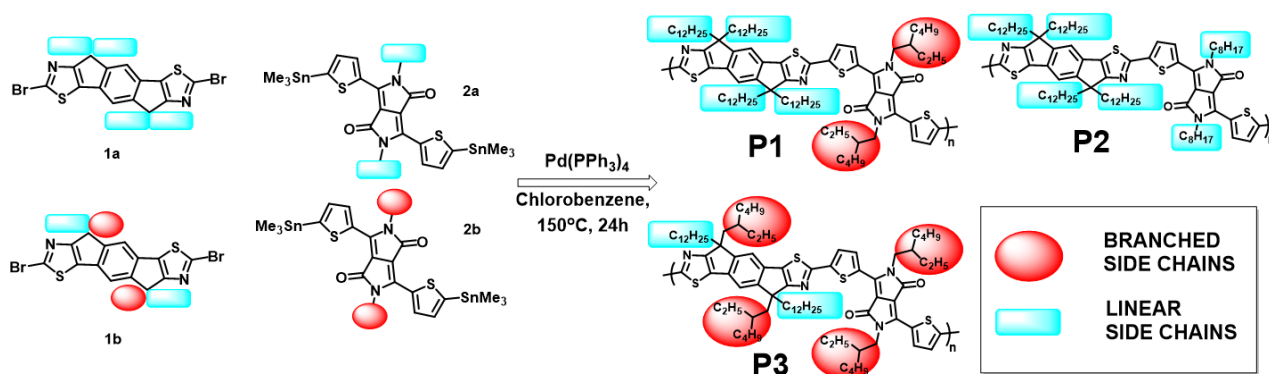

**Figure S20.** Chemical structures of IDTz-DPP polymers with alkyl sidechain engineering. The branched and linear sidechains are highlighted with red and blue highlights, respectively.

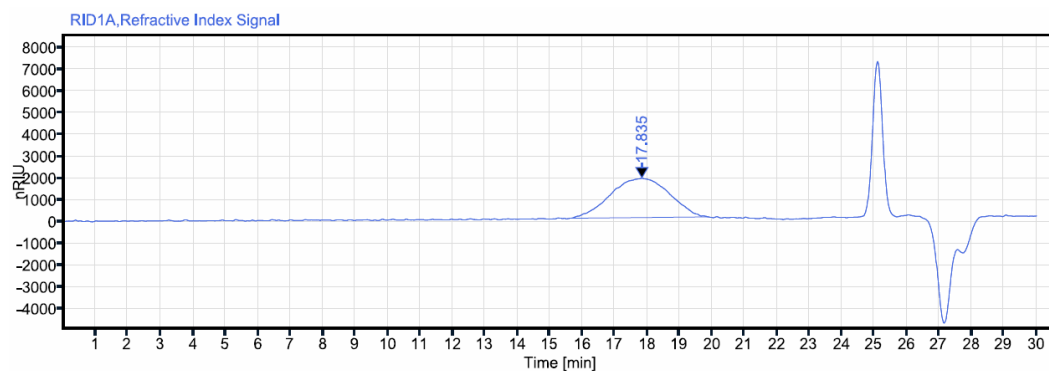

| Peak # | Mp (g/mol) | Mn (g/mol) | Mw (g/mol) | Mz (g/mol) | Mz+1 (g/mol) | Mv (g/mol) | PD       |
|--------|------------|------------|------------|------------|--------------|------------|----------|
| 1      | 62848      | 48527      | 93322      | 166206     | 248908       | 154639     | 1.923094 |

**Figure S21.** GPC chromatograph of polymer P1.

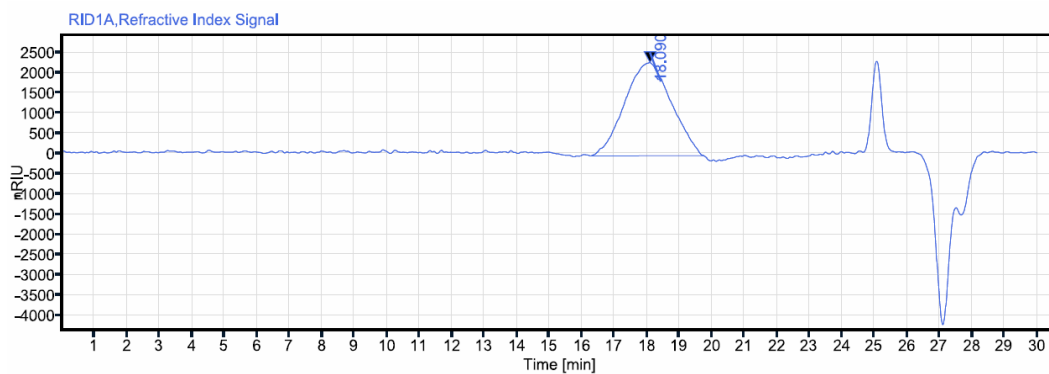

| Peak # | Mp (g/mol) | Mn (g/mol) | Mw (g/mol) | Mz (g/mol) | Mz+1 (g/mol) | Mv (g/mol) | PD       |
|--------|------------|------------|------------|------------|--------------|------------|----------|
| 1      | 47689      | 39922      | 62464      | 93438      | 127796       | 88595      | 1.564651 |

**Figure S22.** GPC chromatograph of polymer P2.

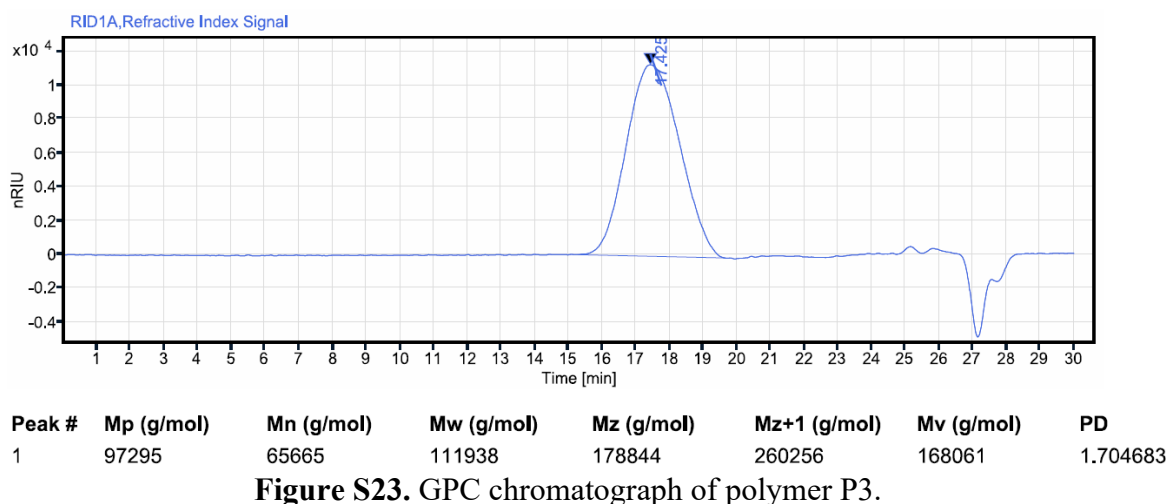

**Table S1.** Macromolecular, optical, and electrochemical properties of IDTz-DPP based copolymers P1–P3.

| Polymer   | $M_n^a$<br>(kg mol <sup>-1</sup> ) | $\mathcal{D}^b$ | $\lambda_{\max}^c$ (nm) |                       | $\lambda_{\text{edge}}^d$<br>(nm) | $E_g^{\text{opt},e}$<br>(eV)<br>film | $E_{\text{HOMO}}^f$<br>(eV) | $E_{\text{LUMO}}^f$<br>(eV) | $E_g^{\text{EC},g}$<br>(eV) |
|-----------|------------------------------------|-----------------|-------------------------|-----------------------|-----------------------------------|--------------------------------------|-----------------------------|-----------------------------|-----------------------------|
|           |                                    |                 | solution                | film                  |                                   |                                      |                             |                             |                             |
| <b>P1</b> | 48.5                               | 1.92            | 729, 669 <sup>h</sup>   | 740, 671 <sup>h</sup> | 787                               | 1.57                                 | -5.26                       | -3.51                       | 1.75                        |
| <b>P2</b> | 39.9                               | 2.00            | 729, 668 <sup>h</sup>   | 742, 672 <sup>h</sup> | 795                               | 1.56                                 | -5.18                       | -3.38                       | 1.80                        |
| <b>P3</b> | 65.5                               | 1.70            | 728, 668 <sup>h</sup>   | 737, 669 <sup>h</sup> | 781                               | 1.59                                 | -5.23                       | -3.37                       | 1.86                        |

<sup>a</sup> Determined by SEC vs polystyrene standards; <sup>b</sup>  $\mathcal{D} = M_w/M_n$ ; <sup>c</sup>  $\lambda_{\max}$  in a chloroform solution and in a thin film spin coated from chloroform solution on quartz; <sup>d</sup> Onset values of absorption spectra in a thin film; <sup>e</sup> Optical band gap  $E_g^{\text{opt}} = 1240/\lambda_{\text{edge}}$ ; <sup>f</sup> Electrochemical  $E_{\text{HOMO}}/E_{\text{LUMO}} = E_{\text{onset}}(\text{Fc}/\text{Fc}^+ \text{ vs. Ag}/\text{Ag}^+) - E_{\text{onset}} - 4.8$ , where 4.8 eV is the ferrocene energy level below the vacuum level and  $E_{\text{onset}}(\text{Fc}/\text{Fc}^+ \text{ vs. Ag}/\text{Ag}^+) = 0.46 \text{ V}$ ; <sup>g</sup> Electrochemical band gap  $E_g^{\text{EC}} = E_{\text{HOMO}} - E_{\text{LUMO}}$ ; <sup>h</sup> Shoulder peak.

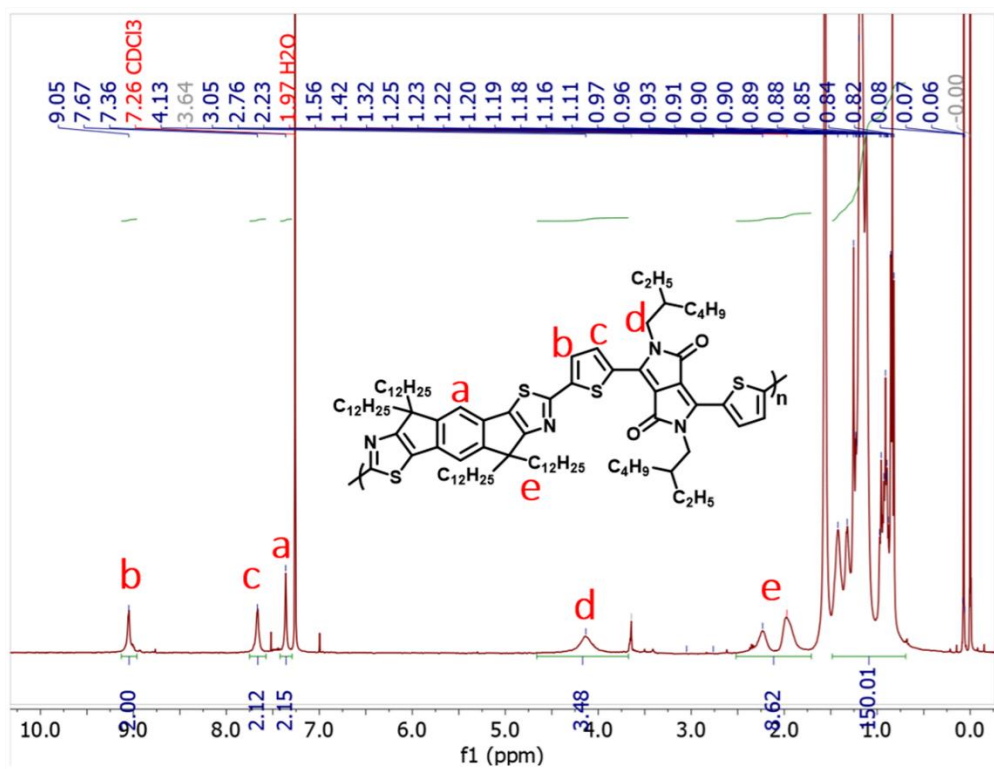

**Figure S24.**  $^1\text{H}$  NMR ( $\text{CDCl}_3$ , 400 MHz, 298 K) of polymer P1.

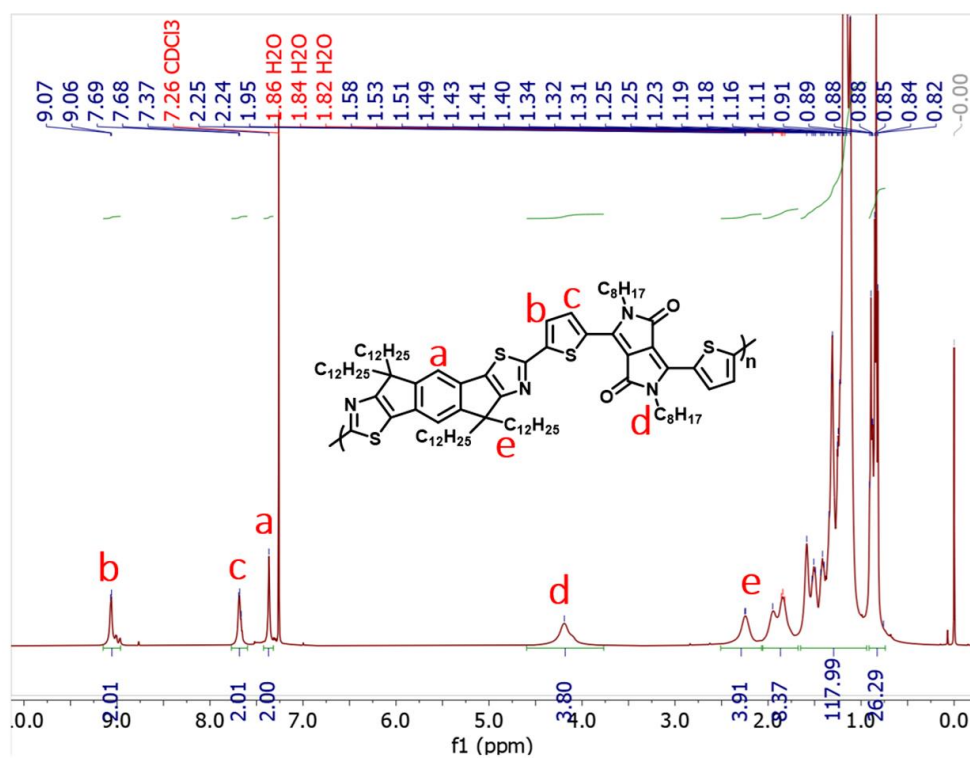

**Figure S25.**  $^1\text{H}$  NMR ( $\text{CDCl}_3$ , 400 MHz, 298 K) of polymer P2.

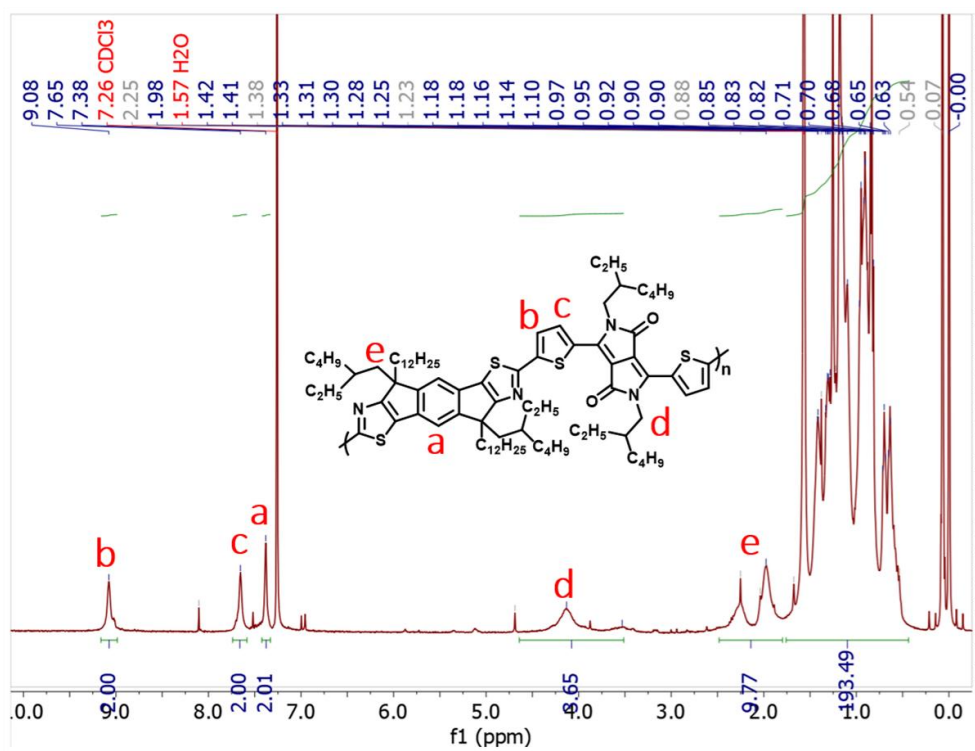

**Figure S26.**  $^1\text{H NMR}$  (CDCl<sub>3</sub>, 400 MHz, 298 K) of polymer P3.
